# Supplementary material for: Immunothrombosis and new-onset atrial fibrillation in the general population: the Rotterdam Study
Source: Springer Nature journal article supplement (doi:10.1007/s00392-021-01938-4), 2021-09-24

**Immunothrombosis and new-onset atrial fibrillation in the general population: the Rotterdam Study**

Martijn J. Tilly<sup>a</sup>, MD, Sven Geurts<sup>a</sup>, MD, Samantha J. Donkel<sup>b</sup>, MD, M. Arfan Ikram<sup>a</sup>, PhD, Natasja M.S. de Groot<sup>c</sup>, PhD, Moniek P.M. de Maat<sup>b</sup>, PhD, \*Maryam Kavousi<sup>a</sup>, PhD

<sup>a</sup> Department of Epidemiology, Erasmus MC University Medical Center Rotterdam, Rotterdam, The Netherlands

<sup>b</sup> Department of Hematology, Erasmus MC University Medical Center Rotterdam, Rotterdam, The Netherlands

<sup>c</sup> Department of Cardiology, Erasmus MC University Medical Center Rotterdam, Rotterdam, The Netherlands

**Corresponding author:** Maryam Kavousi

Erasmus MC, University Medical Center Rotterdam, office Na-2714

PO Box 2040, 3000 CA Rotterdam, The Netherlands

Telephone Number: +31 10 7043997

Email: [m.kavousi@erasmusmc.nl](mailto:m.kavousi@erasmusmc.nl)

Journal: Clinical Research in Cardiology

## Online Resource 2. Flowchart for the inclusion of the study population

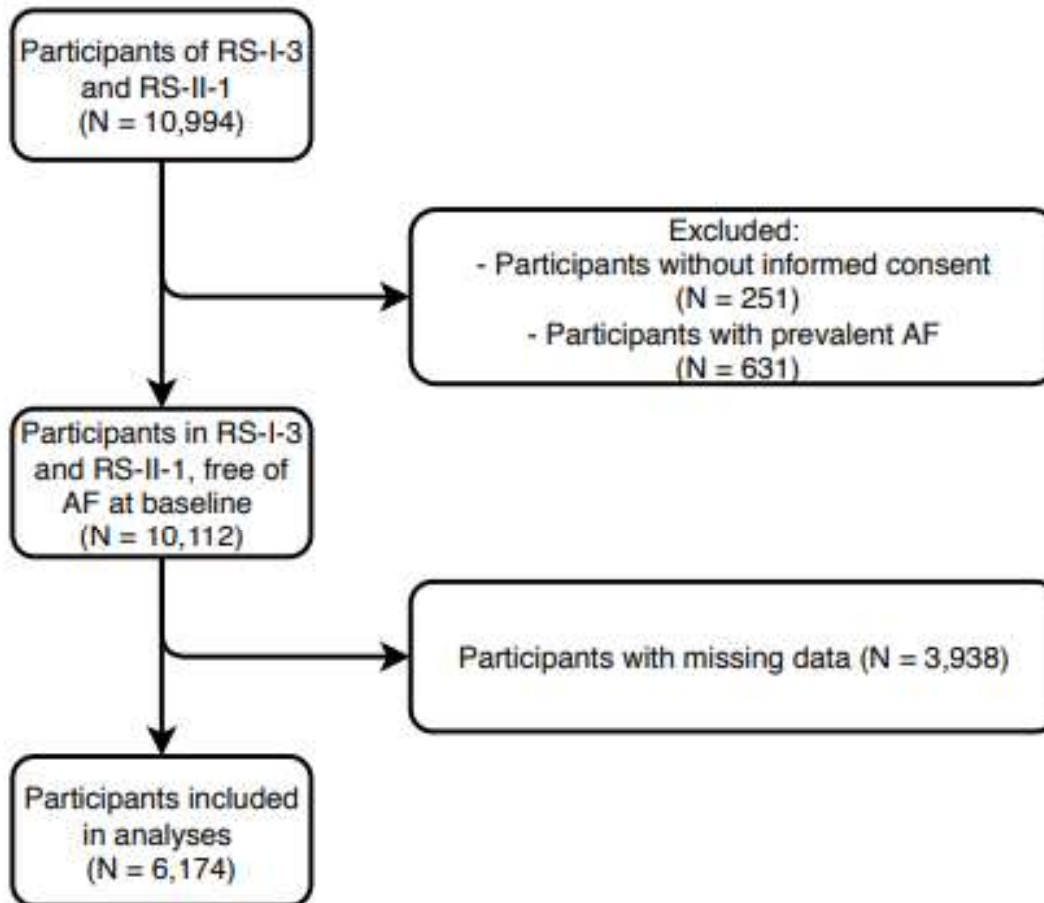

Supplement: MOESM2 [file 19696094]
