# Supplementary material for: Immunothrombosis and new-onset atrial fibrillation in the general population: the Rotterdam Study
Source: Springer Nature journal article supplement (doi:10.1007/s00392-021-01938-4), 2021-09-24
Supplement: MOESM3 [file 19696094]

**Immunothrombosis and new-onset atrial fibrillation in the general population: the Rotterdam Study**

Martijn J. Tilly<sup>a</sup>, MD, Sven Geurts<sup>a</sup>, MD, Samantha J. Donkel<sup>b</sup>, MD, M. Arfan Ikram<sup>a</sup>, PhD, Natasja M.S. de Groot<sup>c</sup>, PhD, Moniek P.M. de Maat<sup>b</sup>, PhD, \*Maryam Kavousi<sup>a</sup>, PhD

<sup>a</sup> Department of Epidemiology, Erasmus MC University Medical Center Rotterdam, Rotterdam, The Netherlands

<sup>b</sup> Department of Hematology, Erasmus MC University Medical Center Rotterdam, Rotterdam, The Netherlands

<sup>c</sup> Department of Cardiology, Erasmus MC University Medical Center Rotterdam, Rotterdam, The Netherlands

**Corresponding author:** Maryam Kavousi

Erasmus MC, University Medical Center Rotterdam, office Na-2714

PO Box 2040, 3000 CA Rotterdam, The Netherlands

Telephone Number: +31 10 7043997

Email: [m.kavousi@erasmusmc.nl](mailto:m.kavousi@erasmusmc.nl)

Journal: Clinical Research in Cardiology

### Online Resource 3. Baseline characteristics of the study population, stratified by sex

|                                          | Men<br>(N=2,654) | Women<br>(N=3,520) | P-value |
|------------------------------------------|------------------|--------------------|---------|
| Age, years                               | 68.4 ± 7.7       | 69.6 ± 8.4         | P<0.001 |
| BMI (kg/m <sup>2</sup> )                 | 26.5 ± 3.7       | 27.3 ± 4.4         | p<0.001 |
| Current smoker, N(%)                     | 642 (24.2%)      | 605 (17.2%)        | p<0.001 |
| Prevalent DM, N(%)                       | 396 (14.9%)      | 401 (11.4%)        | p<0.001 |
| Prevalent CHD, N(%)                      | 377 (14.2%)      | 141 (4.0%)         | p<0.001 |
| Prevalent HF, N(%)                       | 81 (3.1%)        | 82 (2.3%)          | p=0.048 |
| Prevalent hypertension, N(%)             | 1,811 (68.2%)    | 2,351 (66.8%)      | p=0.12  |
| eGFR (mL/min/1.73m <sup>2</sup> )        | 76.2 ± 15.9      | 74.0 ± 15.5        | p<0.001 |
| Systolic blood pressure (mmHg)           | 143.9 ± 20.8     | 142.8 ± 21.4       | p=0.035 |
| Diastolic blood pressure (mmHg)          | 78.4 ± 11.5      | 75.6 ± 10.8        | p<0.001 |
| Blood pressure lowering medication, N(%) | 893 (33.6%)      | 1,279 (36.3%)      | p=0.014 |
| Daily alcohol intake (grams)             | 11.4 (20.9)      | 1.4 (10.1)         | p<0.001 |
| Prevalent alcohol abuse, N(%)            | 286 (10.8%)      | 653 (18.6%)        | p<0.001 |
| Use of cardiac therapy, N(%)             | 226 (8.5%)       | 258 (7.3%)         | p=0.047 |
| Lipid-reducing agents, N(%)              | 366 (13.8%)      | 447 (12.7%)        | p=0.13  |
| Thrombocyte count (x10 <sup>9</sup> /L)  | 241.4 ± 55.7     | 269.4 ± 57.4       | p<0.001 |
| Leucocyte count (x10 <sup>9</sup> /L)    | 7.0 ± 1.9        | 6.7 ± 1.9          | p<0.001 |
| Lymphocyte count (x10 <sup>9</sup> /L)   | 2.6 ± 0.9        | 2.6 ± 1.0          | p=0.528 |
| Lymphocyte percentage of leucocytes (%)  | 37.5 ± 7.5       | 39.4 ± 8.0         | p<0.001 |
| Platelet/lymphocyte ratio                | 99.1 ± 32.3      | 111.6 ± 35.1       | p<0.001 |
| Total cholesterol (mmol/L)               | 5.5 ± 1.0        | 6.0 ± 1.0          | p<0.001 |
| HDL cholesterol (mmol/L)                 | 1.2 ± 0.3        | 1.5 ± 0.4          | p<0.001 |
| CRP (mg/L)                               | 1.7 (3.0)        | 1.8 (3.0)          | p=0.040 |
| Plasma fibrinogen (g/L)                  | 3.7 (1.1)        | 3.9 (1.1)          | p<0.001 |
| Plasma VWF:Ag (IU/mL)                    | 1.20 (0.65)      | 1.18 (0.66)        | p=0.12  |
| ADAMTS13 activity (%)                    | 87.3 ± 16.9      | 94.8 ± 17.6        | p<0.001 |
| MPO-DNA complex (mAU/mL)                 | 54 (47)          | 53 (43)            | p=0.073 |

Categorical data presented as N (%).

Continuous data presented as mean ± SD for normally distributed data, or median (IQR) for skewed distributed data. P-value refers to the difference in characteristics between men and women. Significance was tested using Independent Samples T-tests for normally distributed variables, Mann-Whitney U test for skewed distributed variables, or Pearson's Chi-Squared tests for categorical data.

BMI, Body Mass Index; DM, diabetes mellitus; CHD, coronary heart disease; HF, heart failure; eGFR, estimated glomerular filtration rate; HDL, high density lipoprotein; CRP, C-reactive protein; vWF:Ag, von Willebrand Factor antigen; ADAMTS13, A Disintegrin And Metalloprotease with ThromboSpondin motif repeats 13. Alcohol abuse is defined as ≥4 alcoholic consumptions/day for men, and ≥2 for women.
