# Supplementary material for: Immunothrombosis and new-onset atrial fibrillation in the general population: the Rotterdam Study
Source: Springer Nature journal article supplement (doi:10.1007/s00392-021-01938-4), 2021-09-24
Supplement: MOESM4 [file 19696094]

**Immunothrombosis and new-onset atrial fibrillation in the general population: the Rotterdam Study**

Martijn J. Tilly<sup>a</sup>, MD, Sven Geurts<sup>a</sup>, MD, Samantha J. Donkel<sup>b</sup>, MD, M. Arfan Ikram<sup>a</sup>, PhD,  
Natasja M.S. de Groot<sup>c</sup>, PhD, Moniek P.M. de Maat<sup>b</sup>, PhD, \*Maryam Kavousi<sup>a</sup>, PhD

<sup>a</sup> Department of Epidemiology, Erasmus MC University Medical Center Rotterdam, Rotterdam,  
The Netherlands

<sup>b</sup> Department of Hematology, Erasmus MC University Medical Center Rotterdam, Rotterdam,  
The Netherlands

<sup>c</sup> Department of Cardiology, Erasmus MC University Medical Center Rotterdam, Rotterdam, The  
Netherlands

**Corresponding author:** Maryam Kavousi

Erasmus MC, University Medical Center Rotterdam, office Na-2714

PO Box 2040, 3000 CA Rotterdam, The Netherlands

Telephone Number: +31 10 7043997

Email: [m.kavousi@erasmusmc.nl](mailto:m.kavousi@erasmusmc.nl)

Journal: Clinical Research in Cardiology

**Online Resource 4. Association between markers of immunothrombosis and new-onset atrial fibrillation, stratified by sex**

|                          | Men                    |                        | Women                  |                        |
|--------------------------|------------------------|------------------------|------------------------|------------------------|
|                          | Model 1<br>HR (95% CI) | Model 2<br>HR (95% CI) | Model 1<br>HR (95% CI) | Model 2<br>HR (95% CI) |
| Fibrinogen (g/L)         | 1.02<br>(0.92 – 1.13)  | 0.98<br>(0.88 – 1.09)  | 1.03<br>(0.92 – 1.16)  | 1.04<br>(0.93 – 1.17)  |
| vWF:Ag (IU/mL)           | 1.04<br>(0.93 – 1.16)  | 1.01<br>(0.91 – 1.13)  | 1.06<br>(0.95 – 1.18)  | 1.05<br>(0.94 – 1.17)  |
| ADAMTS13 (%)             | 1.00<br>(0.99 – 1.00)  | 1.00<br>(0.99 – 1.00)  | 1.01<br>(1.00 – 1.01)  | 1.01<br>(1.00 – 1.01)  |
| vWF:Ag/ADAMTS13 ratio    | 1.06<br>(0.96 – 1.17)  | 1.04<br>(0.94 – 1.15)  | 0.97<br>(0.86 – 1.09)  | 0.96<br>(0.85 – 1.08)  |
| MPO-DNA complex (mAU/mL) | 0.98<br>(0.88 – 1.09)  | 0.98<br>(0.88 – 1.09)  | 1.04<br>(0.94 – 1.15)  | 1.04<br>(0.94 – 1.15)  |

*Presented estimated are hazard ratio (95% confidence interval) per one standard deviation increase in each marker.*

*Model 1 is adjusted for age, and Rotterdam Study cohort. Model 2 is additionally adjusted for current smoking, hypertension, alcohol use, renal function, use of cardiac therapy, use of lipid-reducing agents, prevalent diabetes mellitus, prevalent heart failure, and prevalent coronary heart disease.*

*HR, Hazard Ratio; CI, Confidence Interval; vWF:Ag, von Willebrand Factor antigen; ADAMTS13, A Disintegrin And Metalloprotease with ThromboSpondin motif repeats 13.*
