# Supplementary material for: Immunothrombosis and new-onset atrial fibrillation in the general population: the Rotterdam Study
Source: Springer Nature journal article supplement (doi:10.1007/s00392-021-01938-4), 2021-09-24
Supplement: MOESM5 [file 19696094]

**Immunothrombosis and new-onset atrial fibrillation in the general population: the Rotterdam Study**

Martijn J. Tilly<sup>a</sup>, MD, Sven Geurts<sup>a</sup>, MD, Samantha J. Donkel<sup>b</sup>, MD, M. Arfan Ikram<sup>a</sup>, PhD, Natasja M.S. de Groot<sup>c</sup>, PhD, Moniek P.M. de Maat<sup>b</sup>, PhD, \*Maryam Kavousi<sup>a</sup>, PhD

<sup>a</sup> Department of Epidemiology, Erasmus MC University Medical Center Rotterdam, Rotterdam, The Netherlands

<sup>b</sup> Department of Hematology, Erasmus MC University Medical Center Rotterdam, Rotterdam, The Netherlands

<sup>c</sup> Department of Cardiology, Erasmus MC University Medical Center Rotterdam, Rotterdam, The Netherlands

**Corresponding author:** Maryam Kavousi

Erasmus MC, University Medical Center Rotterdam, office Na-2714

PO Box 2040, 3000 CA Rotterdam, The Netherlands

Telephone Number: +31 10 7043997

Email: [m.kavousi@erasmusmc.nl](mailto:m.kavousi@erasmusmc.nl)

Journal: Clinical Research in Cardiology

**Online Resource 5. Association between markers of immunothrombosis and incident atrial fibrillation stratified by sex, per quartile**

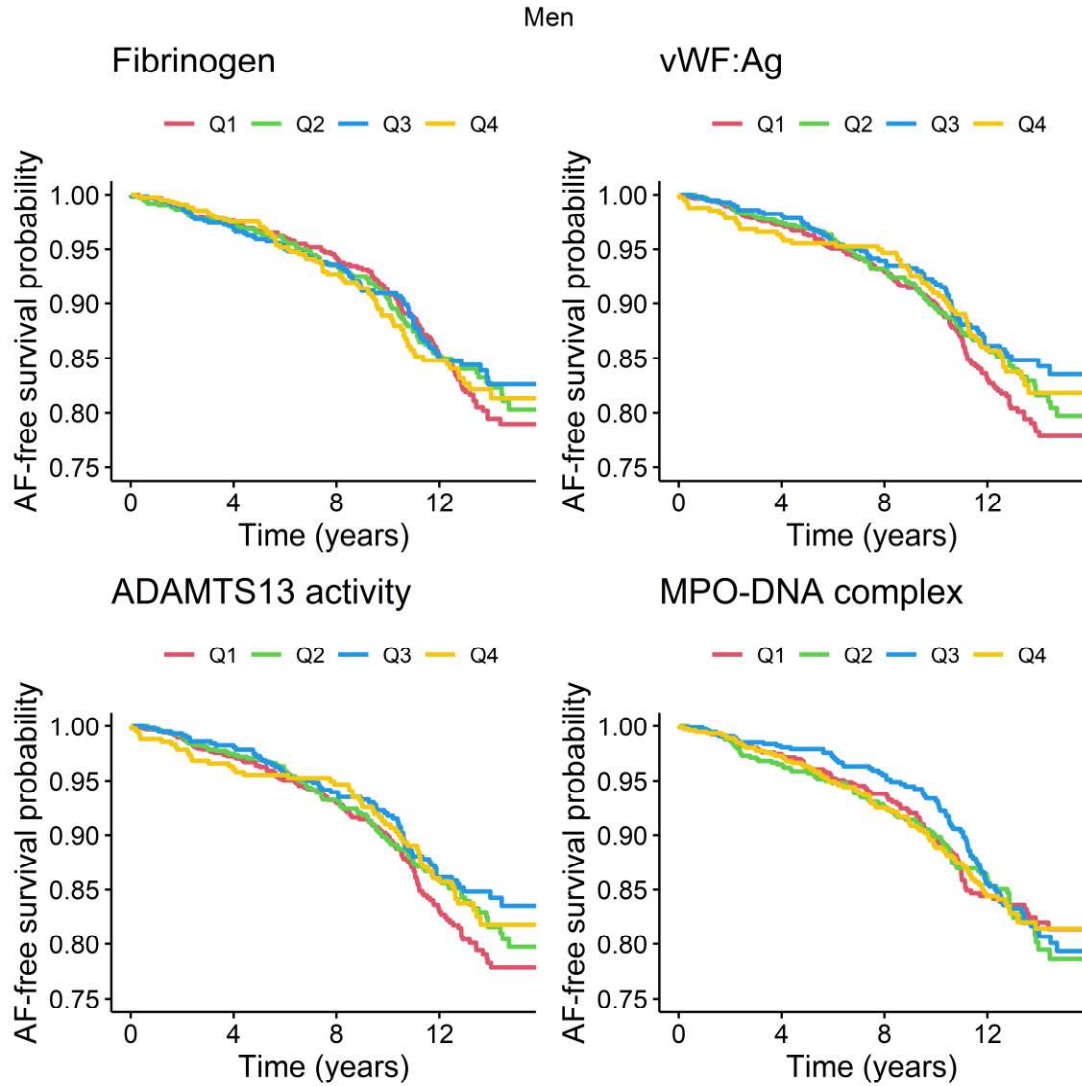

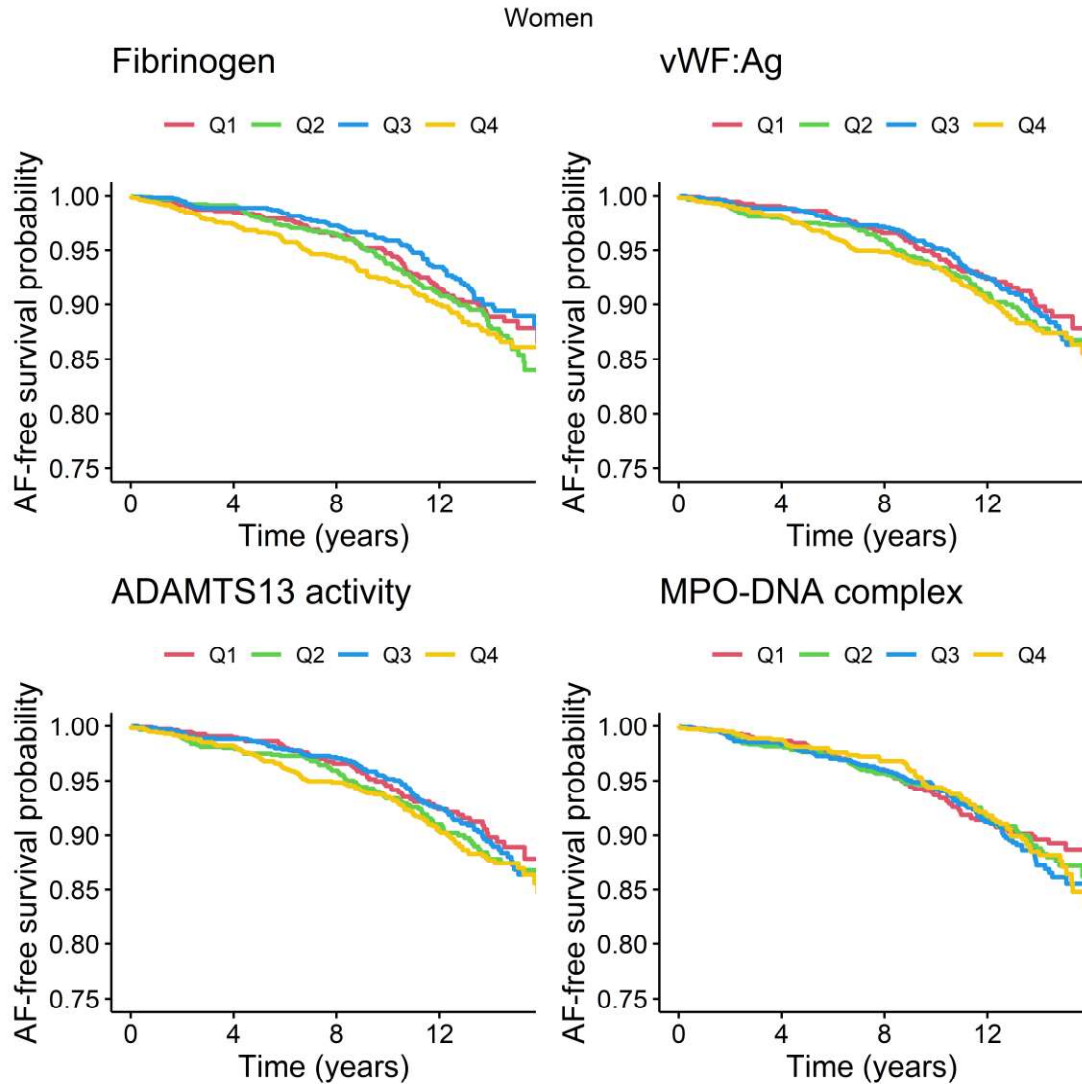

*Adjusted for age, Rotterdam Study cohort, current smoking, alcohol use, renal function, hypertension, use of cardiac therapy, use of lipid-reducing agents, prevalent diabetes mellitus, prevalent heart failure, and prevalent coronary heart disease. Quartiles fibrinogen:  $\leq 3.30$  g/L, 3.31-3.80 g/L, 3.81-4.40 g/L, and  $\geq 4.41$  g/L. vWF:Ag:  $\leq 0.93$  IU/mL, 0.94-1.20 IU/mL, 1.21-1.60 IU/mL, and  $\geq 1.61$  IU/mL. ADAMTS13:  $\leq 80.31\%$ , 80.32-91.00%, 91.01-101.75%, and  $\geq 101.76\%$ . MPO-DNA complex:  $\leq 42$  mAU/mL, 42-53 mAU/mL, 54-87 mAU/mL, and 88 mAU/mL.*
